# Supplementary material for: Flowery nickel–cobalt hydroxide via a solid–liquid sulphur ion grafting route and its application in hybrid supercapacitive storage
Source: Royal Society of Chemistry journal article supplement (doi:10.1039/c8ra02791a), 2018-01-01
Supplement: c8ra02791a1.pdf [file c8ra02791a1.pdf]

## Flowery nickel-cobalt hydroxide via a solid-liquid sulphur ions grafting route and its application in hybrid supercapacitive storage

*Lin Ye,<sup>‡</sup> Zepei Bao,<sup>‡</sup> Yuguang Zhao and Lijun Zhao\**

Key Laboratory of Automobile Materials, Ministry of Education and School of Materials Science and Engineering, Jilin University, Changchun, 130022, P. R. China

E-mail: lijunzhao@jlu.edu.cn

### Electrochemical Calculations

The loading mass of positive and negative electrodes should meet the requirement of charge balance, as shown in Equation (1):

$$m_+/m_- = C_{s-}V_- / (C_{s+}V_+) \quad (1)$$

wherein  $m$ ,  $C_s$  and  $V$  are the mass loadings (g), specific capacitance ( $F\ g^{-1}$ ) and potential window (V), and + and – are corresponding to the positive and negative electrodes.

The specific capacitance ( $C_s$ ,  $F\ g^{-1}$ ), energy density ( $E$ ,  $Wh\ kg^{-1}$ ) and power density ( $P$ ,  $W\ kg^{-1}$ ) values of the individual electrode or ASC were calculated according to the Equations as follow:

$$C_s = I\Delta t / (mV) \quad (2)$$

$$E = 1/2 C_s V^2 \quad (3)$$

$$P = E / \Delta t \quad (4)$$

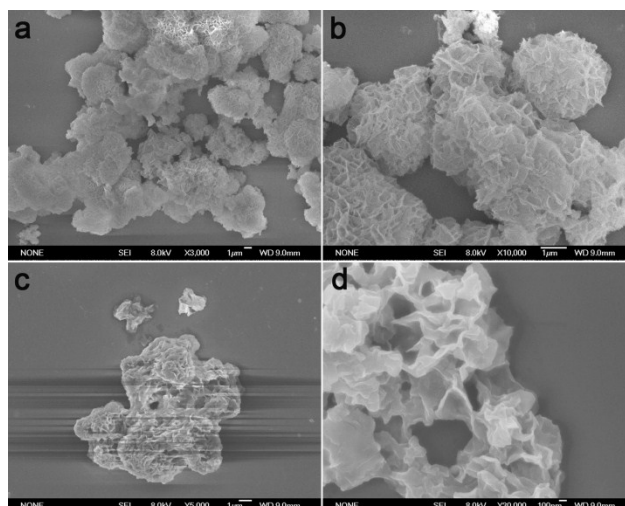

**Fig. S1** FESEM figures for different samples: (a, b) Ni<sub>1</sub>Co<sub>2</sub> precursor; (c, d) Ni<sub>1</sub>Co<sub>2</sub>-

S.

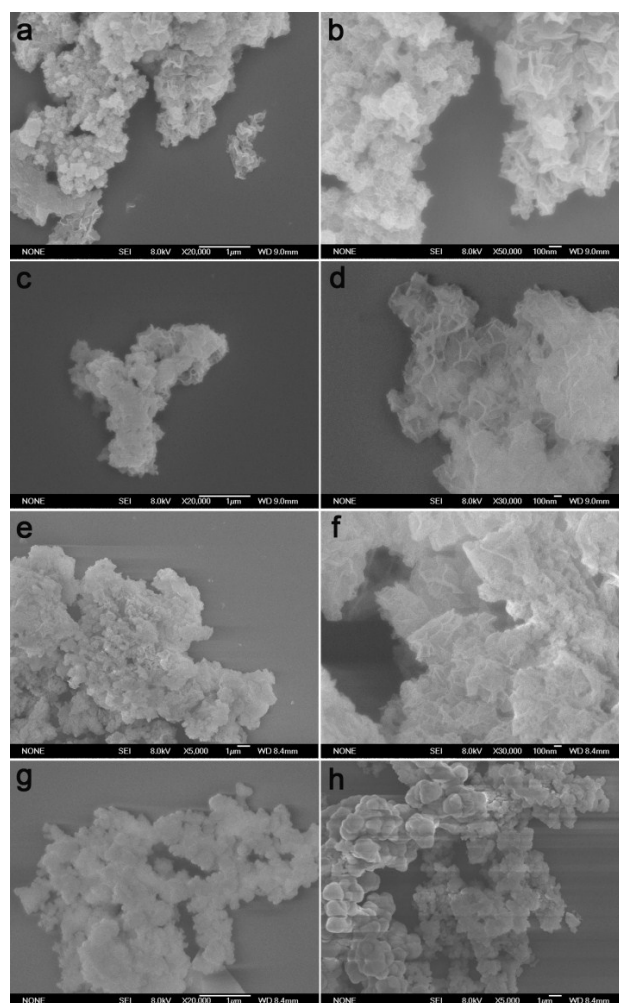

**Fig. S2** FESEM figures for different comparisons: (a, b) Ni<sub>1</sub>Co<sub>2</sub>-AN; (c, d) Ni<sub>2</sub>Co<sub>1</sub>;

(e, f) Co<sub>3</sub> and (g, h) Ni<sub>3</sub>.

**Table S1.** ICP-OES measurement results of Ni1Co2, Ni1Co2-AN, Ni2Co1, Co3, Ni3 and Ni1Co2-S samples.

|           | average Ni concentration (mg L <sup>-1</sup> ) | average Co concentration (mg L <sup>-1</sup> ) | mass ratio Ni/Co | atomic ratio Ni/Co |
|-----------|------------------------------------------------|------------------------------------------------|------------------|--------------------|
| Ni1Co2    | 0.4523                                         | 1.0317                                         | 1:2.28           | 1:2.27             |
| Ni1Co2-AN | 0.2697                                         | 0.6115                                         | 1:2.27           | 1:1.26             |
| Ni2Co1    | 1.3533                                         | 0.7296                                         | 1.85:1           | 1.86:1             |
| Co3       | -0.0035 (ignore)                               | 2.249                                          | 0:3              | 0:3                |
| Ni3       | 2.766                                          | -0.0017 (ignore)                               | 3:0              | 3:0                |
| Ni1Co2-S  | 0.1864                                         | 0.4179                                         | 1:2.24           | 1:2.23             |

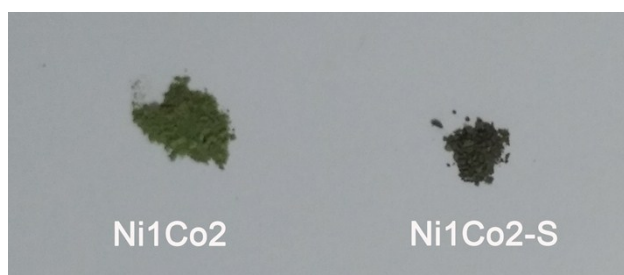

**Fig. S3** Optical image of Ni1Co2 and Ni1Co2-S

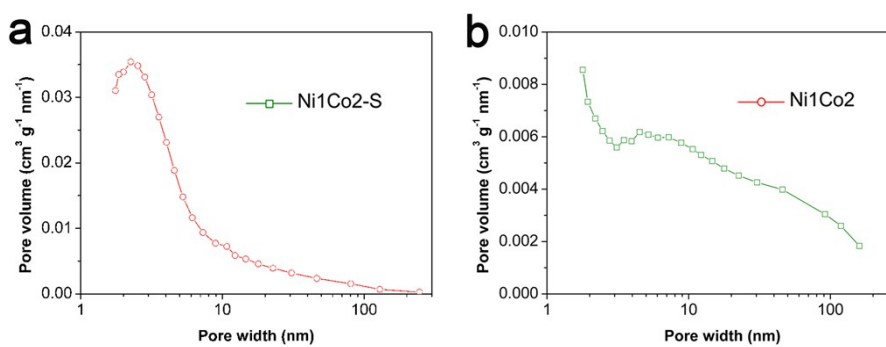

**Fig. S4** Pore width distribution of (a) Ni1Co2 and (b) Ni1Co2-S

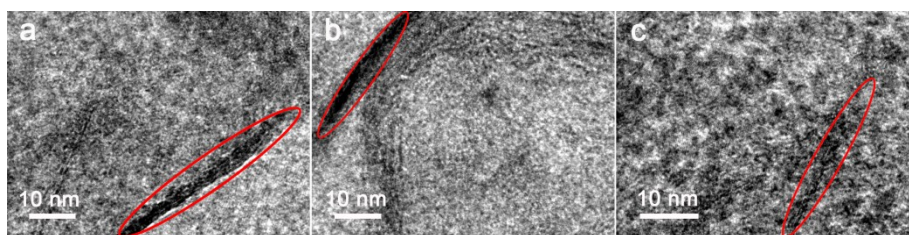

**Fig. S5** HRTEM figures of Ni<sub>1</sub>Co<sub>2</sub>-S at differnt areas

The nanosheet thickness for Fig. S5a-c is ca. 2-5 nm, also indicative of ultrathin structure of Ni<sub>1</sub>Co<sub>2</sub>-S nanosheets.

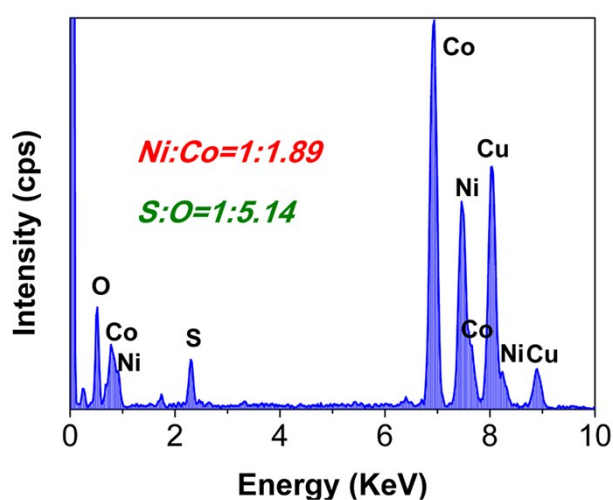

**Fig. S6** EDS spectrum of Ni<sub>1</sub>Co<sub>2</sub>-S.

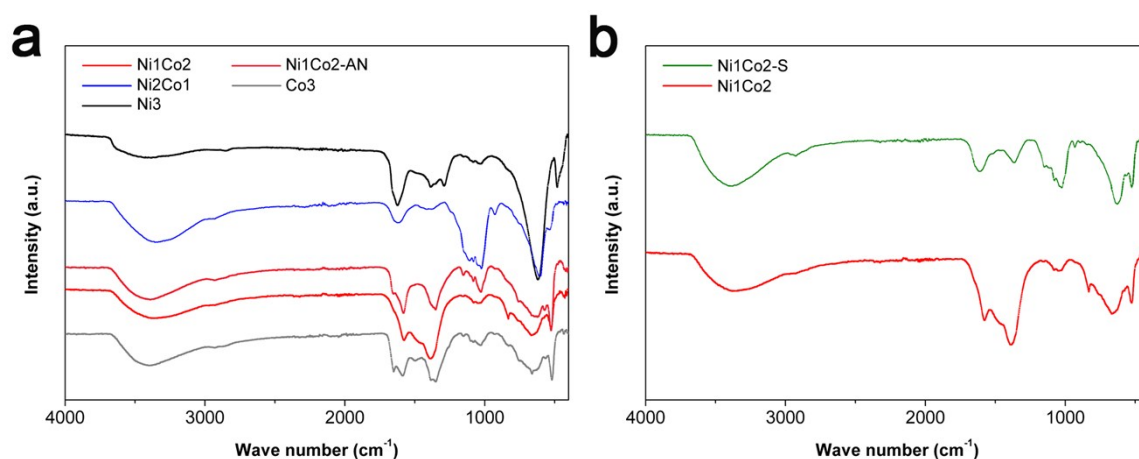

**Fig. S7** (a) FTIR patterns of Ni<sub>1</sub>Co<sub>2</sub>, Ni<sub>1</sub>Co<sub>2</sub>-AN, Ni<sub>2</sub>Co<sub>1</sub>, Co<sub>3</sub> and Ni<sub>3</sub> samples; (b) FTIR patterns of Ni<sub>1</sub>Co<sub>2</sub> and Ni<sub>1</sub>Co<sub>2</sub>-S samples.

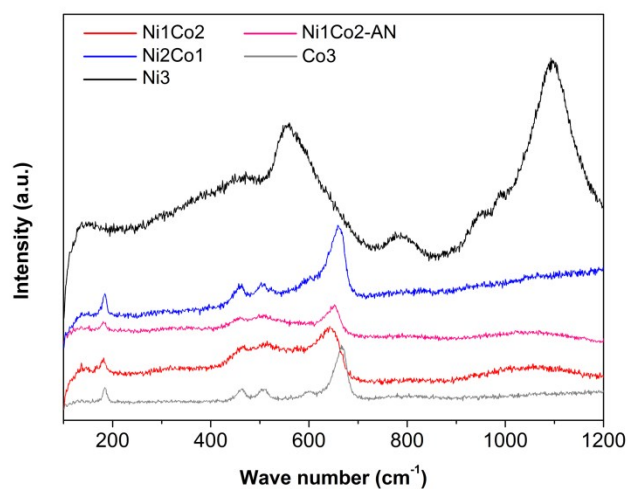

**Fig. S8** Raman patterns of Ni1Co2, Ni1Co2-AN, Ni2Co1, Co3 and Ni3 samples.

Herein, the cumulative number of Raman measurement is 8 times for every samples.

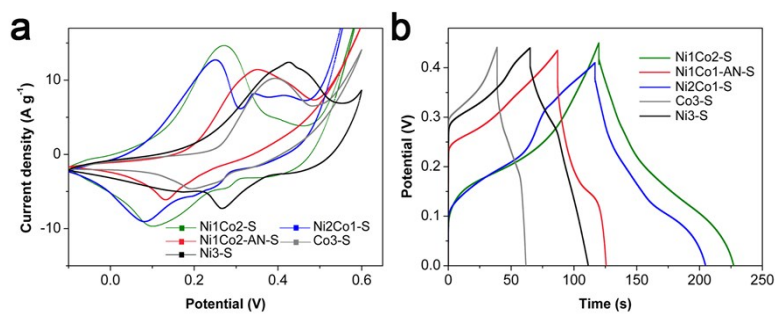

**Fig. S9** (a) CV curves of Ni1Co2-S, Ni1Co2-AN-S, Ni2Co1-S, Co3-S and Ni3-S electrodes at  $5 \text{ mV s}^{-1}$ , (b) GCD curves of Ni1Co2-S, Ni1Co2-AN-S, Ni2Co1-S, Co3-S and Ni3-S electrodes at  $5 \text{ A g}^{-1}$ .

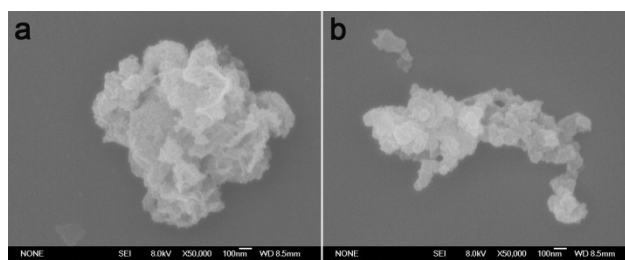

**Fig. S10** (a and b) The FESEM figures of Ni<sub>1</sub>Co<sub>2</sub>-S electrode after 6000 cycles at 10 A g<sup>-1</sup>.
